# Supplementary material for: Disclosure of Grief Questionnaire (DGQ): Entwicklung und Validierung eines Fragebogens zur Erfassung von Kommunikationsmustern nach Trauerfällen
Source: Atypon-hosted journal article supplement (doi:10.1026/0012-1924/a000236), 2019-08-27
Supplement: 0012-1924_a000236_esm1.pdf [file 0012-1924_a000236_esm1.pdf]

Elektronisches Supplement 1. Itemkennwerte für den DGQ ( $N = 302$ )

| Item-Nr. | Item                                                                                              | Sub-skala <sup>a</sup> | $M$  | $SD$ | Schiefe | Kurtosis | Item-schwierig-keit | Trennschärfe <sup>b</sup> |
|----------|---------------------------------------------------------------------------------------------------|------------------------|------|------|---------|----------|---------------------|---------------------------|
| 1        | Es gibt mehrere Personen, mit denen ich mehrmals ausführlich über den Trauerfall gesprochen habe. | MB                     | 2.05 | 0.99 | -0.60   | -0.86    | .68                 | .59                       |
| 2        | Es ist mir wichtig, immer wieder von dem Trauerfall zu erzählen.                                  | MB                     | 1.31 | 1.03 | 0.29    | -1.06    | .44                 | .81                       |
| 3        | Je häufiger ich von dem Trauerfall erzähle, desto klarer wird das Geschehen für mich.             | MB                     | 1.29 | 1.05 | 0.24    | -1.15    | .43                 | .71                       |
| 4        | Ich denke wesentlich häufiger über den Trauerfall nach, als ich darüber spreche.                  | VS                     | 2.12 | 0.97 | -0.68   | -0.77    | .71                 | .54                       |
| 5        | Wenn ich von dem Trauerfall erzähle, dann schockiere ich meine Zuhörer nur.                       | VS                     | 0.83 | 0.93 | 0.82    | -0.35    | .28                 | .54                       |
| 6*       | Meine Gefühle bezüglich des Trauerfalls muss ich mit mir selbst ausmachen.                        | VS                     | 1.37 | 1.05 | 0.78    | -1.15    | .46                 | .53                       |
| 7        | Ich habe das Bedürfnis, sehr oft von dem Trauerfall zu sprechen.                                  | MB                     | 0.89 | 0.98 | 0.86    | -0.29    | .30                 | .78                       |
| 8        | Oft versagt meine Stimme, wenn ich von dem Trauerfall erzähle.                                    | VS                     | 0.92 | 1.02 | 0.80    | -0.56    | .31                 | .59                       |
| 9        | Ich erzähle häufig, wie hilflos ich mich nach dem Trauerfall gefühlt habe.                        | MB                     | 0.74 | 0.89 | 1.04    | 0.18     | .25                 | .51                       |
| 10       | Nachdem ich jemandem von dem Trauerfall erzählt habe, bin ich immer ganz erschöpft.               | VS                     | 0.83 | 0.91 | 0.78    | -0.41    | .28                 | .60                       |
| 11rec    | Es würde mir nicht weiterhelfen, wenn ich jemandem von dem Trauerfall erzählen würde.             | MB                     | 2.24 | 0.95 | -1.04   | -0.03    | .75                 | .57                       |

|       |                                                                                                                    |    |      |      |       |       |     |     |
|-------|--------------------------------------------------------------------------------------------------------------------|----|------|------|-------|-------|-----|-----|
| 12    | Ich finde es schwer, mit jemandem über den Trauerfall zu sprechen.                                                 | VS | 0.86 | 0.95 | 0.84  | -0.32 | .29 | .73 |
| 13    | Ich finde nie die passende Gelegenheit, meine Gefühle bezüglich des Trauerfalls mitzuteilen.                       | VS | 0.87 | 1.04 | 0.89  | -0.51 | .29 | .64 |
| 14    | Je häufiger ich von dem Trauerfall erzähle, desto besser kann ich meine Gefühle in Worte fassen.                   | MB | 1.25 | 0.95 | 0.24  | -0.90 | .42 | .66 |
| 15    | Ich fühle mich extrem angespannt, während ich von dem Trauerfall erzähle.                                          | VS | 1.06 | 0.94 | 0.54  | -0.62 | .35 | .66 |
| 16    | Nachdem ich von dem Trauerfall erzählt habe, fühle ich mich ganz erleichtert.                                      | MB | 0.95 | 0.83 | 0.68  | 0.05  | .32 | .59 |
| 17    | Es ist mir angenehmer, nicht über den Trauerfall zu sprechen.                                                      | VS | 0.84 | 0.98 | 0.94  | -0.22 | .28 | .50 |
| 18    | Ich möchte meine/n Partner/in, meine Familie / Freunde nicht belasten, indem ich Ihnen von dem Trauerfall erzähle. | VS | 0.95 | 1.01 | 0.77  | -0.79 | .32 | .61 |
| 19rec | Es fällt mir sehr leicht, über den Trauerfall zu reden.                                                            | VS | 1.80 | 1.00 | -0.29 | -1.03 | .60 | .62 |
| 20    | Ich habe den Drang, immer wieder von dem Trauerfall zu berichten.                                                  | MB | 0.65 | 0.88 | 1.23  | 0.61  | .22 | .68 |
| 21    | Wenn ich von dem Trauerfall spreche, werde ich sehr traurig.                                                       | VS | 1.75 | 0.97 | -0.12 | -1.08 | .58 | .61 |
| 22    | Ich mache mir zwar viele Gedanken über den Trauerfall, spreche aber kaum darüber.                                  | VS | 1.16 | 1.04 | 0.51  | -0.91 | .39 | .64 |
| 23*   | Wenn ich von dem Trauerfall erzähle, dann bringe ich meine Zuhörer in eine unangenehme Situation.                  | VS | 0.83 | 0.95 | 0.95  | -0.09 | .28 | .64 |
| 24*   | Wenn ich von dem Trauerfall spreche, fühle ich mich emotional aufgewühlt.                                          | VS | 1.55 | 0.98 | 0.08  | -1.02 | .52 | .68 |

*Anmerkungen:*  $N$  = Stichprobengröße;  $M$  = Mittelwert (Skala: 0–3);  $SD$  = Standardabweichung; DGQ = Disclosure of Grief Questionnaire; VS = „Verschwiegenheit“; MB = „Mitteilungsbedürfnis“.

<sup>a</sup> Extraktionsmethode = Hauptkomponentenanalyse mit Varimax-Rotation, Kaiser-Meyer-Olkin (KMO-) Maß = .88, Bartlett's Test,  $p < .001$ ; <sup>b</sup> Trennschärfe für jeweilige

Subskala; rec = Items zur Berechnung der Skalenwerte invertieren; \* neu generierte bzw. stärker veränderte Items im Vergleich zum Fragebogen zum Offenlegen von traumatischen Erfahrungen (FOT; Müller et al., 2000), wobei das ebenso neu generierte Item „Ich erzähle häufig, wie einsam ich mich nach dem Trauerfall gefühlt habe“ aufgrund zu geringer Itemschwierigkeiten von  $< .20$  eliminiert wurde.
